# Supplementary material for: Bifidobacterium species associated with breastfeeding produce aromatic lactic acids in the infant gut
Source: PubMed Central journal article supplement (PMC8556157; doi:10.1038/s41564-021-00970-4), 2021-10-21
Supplement: 41564_2021_970_MOESM1_ESM.pdf [file 41564_2021_970_MOESM1_ESM.pdf]

**Supplementary information**

---

***Bifidobacterium* species associated with breastfeeding produce aromatic lactic acids in the infant gut**

---

In the format provided by the authors and unedited

## **Supplementary Information for**

***Bifidobacterium* species associated with breastfeeding produce aromatic lactic acids in the infant gut**

**Contains:**

**Supplementary Table 1-10**

**Supplementary Figures 1-15**

## Supplementary tables

**Supplementary Table 1.** Aromatic amino acids and derivatives and their retention time, mass-to-charge ratio ( $m/z$ ) and internal standard.

| Pathway <sup>1</sup> | Metabolite                    | Retention time [min] | $m/z$    | ESI <sup>+</sup> ion | Internal standard <sup>2</sup> |
|----------------------|-------------------------------|----------------------|----------|----------------------|--------------------------------|
| Phenylalanine        | Phenylalanine                 | 2.6                  | 166.0863 | [M+H] <sup>+</sup>   | L-Phenylalanine (ring-d5)      |
| Phenylalanine        | Phenyllactic acid             | 4.7                  | 189.0522 | [M+Na] <sup>+</sup>  | L-Phenylalanine (ring-d5)      |
| Phenylalanine        | Phenylacetic acid             | 5.3                  | 137.0597 | [M+H] <sup>+</sup>   | L-Phenylalanine (ring-d5)      |
| Phenylalanine        | Phenylpropionic acid          | 5.9                  | 151.0754 | [M+H] <sup>+</sup>   | L-Phenylalanine (ring-d5)      |
| Tryptophan           | Kynurenine                    | 2.5                  | 209.0921 | [M+H] <sup>+</sup>   | L-Tryptophan (indole-d5)       |
| Tryptophan           | Tryptophan                    | 3.4                  | 205.0972 | [M+H] <sup>+</sup>   | L-Tryptophan (indole-d5)       |
| Tryptophan           | Xanthurenic acid              | 3.6                  | 206.0448 | [M+H] <sup>+</sup>   | L-Tryptophan (indole-d5)       |
| Tryptophan           | Tryptamine                    | 3.6                  | 161.1073 | [M+H] <sup>+</sup>   | L-Tryptophan (indole-d5)       |
| Tryptophan           | Kynurenic acid                | 3.9                  | 190.0499 | [M+H] <sup>+</sup>   | L-Tryptophan (indole-d5)       |
| Tryptophan           | Indolelactic acid             | 5.0                  | 206.0812 | [M+H] <sup>+</sup>   | Indoleacetic acid (2,2-d2)     |
| Tryptophan           | Indolealdehyde                | 5.2                  | 146.0600 | [M+H] <sup>+</sup>   | Indoleacetic acid (2,2-d2)     |
| Tryptophan           | Indoleacetic acid             | 5.3                  | 176.0706 | [M+H] <sup>+</sup>   | Indoleacetic acid (2,2-d2)     |
| Tryptophan           | Indoleethanol                 | 5.4                  | 162.0913 | [M+H] <sup>+</sup>   | Indoleacetic acid (2,2-d2)     |
| Tryptophan           | Indolepropionic acid          | 5.9                  | 190.0863 | [M+H] <sup>+</sup>   | Indoleacetic acid (2,2-d2)     |
| Tyrosine             | Tyrosine                      | 1.3                  | 182.0812 | [M+H] <sup>+</sup>   | L-Tyrosine (ring-d4)           |
| Tyrosine             | Tyramine                      | 1.3                  | 138.0913 | [M+H] <sup>+</sup>   | L-Tyrosine (ring-d4)           |
| Tyrosine             | 4-Hydroxyphenyllactic acid    | 3.5                  | 205.0471 | [M+Na] <sup>+</sup>  | L-Tyrosine (ring-d4)           |
| Tyrosine             | 4-Hydroxyphenylacetic acid    | 3.9                  | 153.0546 | [M+H] <sup>+</sup>   | L-Tyrosine (ring-d4)           |
| Tyrosine             | 4-Hydroxyphenylpropionic acid | 4.6                  | 189.0522 | [M+Na] <sup>+</sup>  | L-Tyrosine (ring-d4)           |
| <i>IS</i>            | L-Phenylalanine (ring-d5)     | 2.6                  | 171.1176 | [M+H] <sup>+</sup>   | -                              |
| <i>IS</i>            | L-Tryptophan (indole-d5)      | 3.4                  | 210.1285 | [M+H] <sup>+</sup>   | -                              |
| <i>IS</i>            | L-Tyrosine (ring-d4)          | 1.3                  | 186.1063 | [M+H] <sup>+</sup>   | -                              |
| <i>IS</i>            | Indoleacetic acid (2,2-d2)    | 5.3                  | 178.0832 | [M+H] <sup>+</sup>   | -                              |

<sup>1</sup>IS, internal standard

<sup>2</sup>Four different internal standards were used to obtain semi-quantitative concentrations.

**Supplementary Table 2.** Faecal concentration of aromatic amino acid metabolites in the SKOT cohort (n=59).

| Metabolite                            | Prevalence (%) | Concentration (nmol/g faeces) <sup>1</sup> |                |      |       |
|---------------------------------------|----------------|--------------------------------------------|----------------|------|-------|
|                                       |                | Median [IQR]                               | Mean [±SD]     | Min  | Max   |
| <i>Tyrosine metabolites</i>           |                |                                            |                |      |       |
| <i>Tyrosine</i>                       | 100.0          | 372.8 [291.3-503.2]                        | 387.5 [±148.1] | 89.9 | 756.6 |
| <i>Tyramine</i>                       | 91.5           | 11.2 [2.9-38.8]                            | 45.5 [±90.4]   | 0.0  | 447.0 |
| <i>4-hydroxyphenyllactic acid</i>     | 50.8           | 1.5 [0.0-9.0]                              | 11.5 [±28.9]   | 0.0  | 179.9 |
| <i>4-hydroxyphenylacetic acid</i>     | 96.6           | 159.3 [55.0-380.2]                         | 219.6 [±190.1] | 0.0  | 680.9 |
| <i>4-hydroxyphenyl-propionic acid</i> | 28.8           | 0.0 [0.0-11.2]                             | 5.7 [±10.8]    | 0.0  | 52.7  |
| <i>Phenylalanine metabolites</i>      |                |                                            |                |      |       |
| <i>Phenylalanine</i>                  | 100.0          | 221.5 [189.7-257.4]                        | 222.1 [±56.2]  | 71.8 | 360.6 |
| <i>Phenyllactic acid</i>              | 88.1           | 16.0 [5.3-31.1]                            | 20.4 [±18.2]   | 0.0  | 69.7  |
| <i>Phenylacetic acid</i>              | 100.0          | 212.2 [102.0-307.4]                        | 216.1 [±135.7] | 3.1  | 551.7 |
| <i>Phenylpropionic acid</i>           | 55.9           | 7.2 [0.0-21.6]                             | 18.1 [±41.0]   | 0.0  | 293.1 |
| <i>Tryptophan metabolites</i>         |                |                                            |                |      |       |
| <i>Tryptophan</i>                     | 100.0          | 167.6 [123.8-203.9]                        | 160.1 [±60.3]  | 15.7 | 275.3 |
| <i>Tryptamine</i>                     | 94.9           | 4.0 [1.5-9.0]                              | 8.7 [±13.1]    | 0.0  | 68.0  |
| <i>Kynurenine</i>                     | 66.1           | 0.5 [0.0-0.8]                              | 0.4 [±0.4]     | 0.0  | 1.0   |
| <i>Kynurenic acid</i>                 | 100.0          | 3.8 [2.2-5.7]                              | 4.6 [±3.2]     | 0.2  | 14.0  |
| <i>Xanthurenic acid</i>               | 98.3           | 1.2 [0.9-1.8]                              | 1.4 [±0.9]     | 0.0  | 4.3   |
| <i>Indolelactic acid</i>              | 89.8           | 17.9 [4.3-44.9]                            | 36.5 [±51.1]   | 0.0  | 266.8 |
| <i>Indoleacetic acid</i>              | 100.0          | 11.1 [5.2-24.4]                            | 23.6 [±38.6]   | 1.0  | 226.0 |
| <i>Indolepropionic acid</i>           | 67.8           | 1.5 [0.0-10.0]                             | 6.5 [±9.9]     | 0.0  | 49.6  |
| <i>Indolealdehyde</i>                 | 100.0          | 1.7 [1.4-2.5]                              | 2.1 [±1.2]     | 0.9  | 6.9   |
| <i>Indoleethanol</i>                  | 69.5           | 0.7 [0.0-1.0]                              | 0.7 [±0.6]     | 0.0  | 3.0   |

<sup>1</sup>Semi-quantitative concentrations were obtained using four isotope-labelled internal standards.

**Supplementary Table 3.** Identification of type 4 *ldh* in whole genome sequenced human gut derived *Bifidobacterium* species.

| <b>Species</b>              | <b>Number of strains</b> | <b>Number of strains with type 4 <i>ldh</i></b> | <b>Percent of strains with type 4 <i>ldh</i></b> |
|-----------------------------|--------------------------|-------------------------------------------------|--------------------------------------------------|
| <i>B. breve</i>             | 44                       | 44                                              | 100 %                                            |
| <i>B. longum</i>            | 27                       | 27                                              | 100 %                                            |
| <i>B. animalis</i>          | 24                       | 0                                               | 0 %                                              |
| <i>B. bifidum</i>           | 9                        | 9                                               | 100 %                                            |
| <i>B. adolescentis</i>      | 8                        | 0                                               | 0 %                                              |
| <i>B. kashiwanohense</i>    | 3                        | 0                                               | 0 %                                              |
| <i>B. pseudolongum</i>      | 3                        | 0                                               | 0 %                                              |
| <i>B. angulatum</i>         | 2                        | 2                                               | 100 %                                            |
| <i>B. catenulatum</i>       | 2                        | 0                                               | 0 %                                              |
| <i>B. dentium</i>           | 2                        | 0                                               | 0 %                                              |
| <i>B. pseudocatenulatum</i> | 2                        | 0                                               | 0 %                                              |
| <i>B. scardovii</i>         | 1                        | 1                                               | 100 %                                            |

**Supplementary Table 4.** Faecal concentration of aromatic amino acid metabolites in the Copenhagen Infant Gut cohort (n=267).

| Metabolite                            | Prevalence (%) | Concentration (nmol/g faeces) <sup>1</sup> |                      |      |        |
|---------------------------------------|----------------|--------------------------------------------|----------------------|------|--------|
|                                       |                | Median [IQR]                               | Mean [ $\pm$ SD]     | Min  | Max    |
| <i>Tyrosine metabolites</i>           |                |                                            |                      |      |        |
| <i>Tyrosine</i>                       | 100.0          | 307.4 [194.9-457.9]                        | 358.1 [ $\pm$ 231.8] | 26.6 | 1776.0 |
| <i>Tyramine</i>                       | 63.7           | 11.0 [0.0-194]                             | 185.1 [ $\pm$ 363.7] | 0.0  | 2428.0 |
| <i>4-hydroxyphenyllactic acid</i>     | 93.3           | 40.6 [10.9-76.6]                           | 53.5 [ $\pm$ 54.3]   | 0.0  | 292.1  |
| <i>4-hydroxyphenylacetic acid</i>     | 44.9           | 0.0 [0.0-41.9]                             | 51.7 [ $\pm$ 125.7]  | 0.0  | 995.3  |
| <i>4-hydroxyphenyl-propionic acid</i> | 16.1           | 0.0 [0.0-0.0]                              | 13.5 [ $\pm$ 64.6]   | 0.0  | 733.2  |
| <i>Phenylalanine metabolites</i>      |                |                                            |                      |      |        |
| <i>Phenylalanine</i>                  | 100.0          | 381.1 [267-497.4]                          | 419.9 [ $\pm$ 250.0] | 37.1 | 2159.0 |
| <i>Phenyllactic acid</i>              | 97.8           | 38 [17.6-73.4]                             | 54.9 [ $\pm$ 56.7]   | 0.0  | 477.4  |
| <i>Phenylacetic acid</i>              | 29.2           | 0.0 [0.0-9.6]                              | 24.5 [ $\pm$ 76.6]   | 0.0  | 718.2  |
| <i>Phenylpropionic acid</i>           | 10.1           | 0.0 [0.0-0.0]                              | 10.9 [ $\pm$ 49.1]   | 0.0  | 601.6  |
| <i>Tryptophan metabolites</i>         |                |                                            |                      |      |        |
| <i>Tryptophan</i>                     | 100.0          | 128.3 [84.6-197.1]                         | 155.7 [ $\pm$ 104.0] | 10.6 | 647.8  |
| <i>Tryptamine</i>                     | 25.8           | 0.0 [0.0-0.1]                              | 4.0 [ $\pm$ 13.2]    | 0.0  | 104.2  |
| <i>Kynurenine</i>                     | 82.4           | 0.3 [0.1-0.5]                              | 0.4 [ $\pm$ 0.4]     | 0.0  | 2.3    |
| <i>Kynurenic acid</i>                 | 100.0          | 5.9 [3.4-9.0]                              | 8.1 [ $\pm$ 8.7]     | 0.9  | 90.8   |
| <i>Xanthurenic acid</i>               | 98.5           | 0.7 [0.5-1.2]                              | 1.0 [ $\pm$ 0.9]     | 0.0  | 6.3    |
| <i>Indolelactic acid</i>              | 98.1           | 47.7 [15.0-103.4]                          | 69.0 [ $\pm$ 70.2]   | 0.0  | 332.2  |
| <i>Indoleacetic acid</i>              | 47.2           | 0.0 [0.0-1.0]                              | 2.1 [ $\pm$ 9.9]     | 0.0  | 127.2  |
| <i>Indolepropionic acid</i>           | 7.1            | 0.0 [0.0-0.0]                              | 0.5 [ $\pm$ 3.2]     | 0.0  | 39.0   |
| <i>Indolealdehyde</i>                 | 85.4           | 0.9 [0.5-2.3]                              | 2.1 [ $\pm$ 3.4]     | 0.0  | 23.0   |
| <i>Indoleethanol</i>                  | 4.5            | 0.0 [0.0-0.0]                              | 0.1 [ $\pm$ 0.3]     | 0.0  | 3.2    |

<sup>1</sup>Semi-quantitative concentrations were obtained using four isotope-labelled internal standards.

**Supplementary Table 5.** Primers used for 16S rRNA amplicon sequencing and quantitative PCR.

| Primer target                                  | Primer name | Sequence (5'-3')                         | Final conc. (μM) | Annealing temperature (°C) | Reference                           |
|------------------------------------------------|-------------|------------------------------------------|------------------|----------------------------|-------------------------------------|
| <b>Universal bacteria (NGS PCR)</b>            | PBU_X       | A-adapter-TCAG-barcode-CCTACGGGAGGCAGCAG | 1                | 72                         | Laursen et al., 2017 <sup>1</sup>   |
|                                                | PBR_P1      | trP1-adapter-ATTACCGCGGCTGCTGG           | 1                |                            |                                     |
| <b>Universal bacteria (qPCR)</b>               | PBU         | CCTACGGGAGGCAGCAG                        | 0.2              | 60                         | Tulstrup et al., 2015 <sup>2</sup>  |
|                                                | PBR         | ATTACCGCGGCTGCTGG                        | 0.2              |                            |                                     |
| <b><i>B. longum</i> subsp. <i>infantis</i></b> | Blon0915F   | CGTATTGGCTTTGTACGCATTT                   | 0.75             | 50                         | Frese et al., 2017 <sup>3</sup>     |
|                                                | Blon0915R   | ATCGTGCCGGTGAGATTTAC                     | 0.75             |                            |                                     |
| <b><i>B. longum</i> subsp. <i>longum</i></b>   | lon_0274_F  | GAGGCGATGGTCTGGAAGTT                     | 0.75             | 50                         | Lawley et al., 2017 <sup>4</sup>    |
|                                                | lon_0274_R  | CCACATCGCCGAGAAGATTC                     | 0.75             |                            |                                     |
| <b><i>B. bifidum</i></b>                       | BiBIF-1     | CCACATGATCGCATGTGATTG                    | 0.5              | 60                         | Matsuki et al., 2004 <sup>5</sup>   |
|                                                | BiBIF-2     | CCGAAGGCTTGCTCCCAA                       | 0.5              |                            |                                     |
| <b><i>B. breve</i></b>                         | B_bre-f     | GCTCGTCGTTGCCGCAAGGAC<br>GTT             | 0.5              | 72                         | Junick and Blaut, 2012 <sup>6</sup> |
|                                                | B_bre-r     | ACAGAATGTACGGATCCTCGAG<br>CACG           | 0.5              |                            |                                     |

**Supplementary Table 6.** *Bifidobacterium* strains used in this study.

| <b>Strain</b>                                                                                                                  | <b>Culture Collection<sup>1</sup></b> |
|--------------------------------------------------------------------------------------------------------------------------------|---------------------------------------|
| <i>B. adolescentis</i> E194a                                                                                                   | DSM 20083 <sup>T</sup>                |
| <i>B. animalis</i> subsp. <i>lactis</i> UR1                                                                                    | DSM 10140 <sup>T</sup>                |
| <i>B. animalis</i> subsp. <i>animalis</i> R101-8                                                                               | DSM 20104 <sup>T</sup>                |
| <i>B. bifidum</i> Ti                                                                                                           | DSM 20456 <sup>T</sup>                |
| <i>B. breve</i> S1                                                                                                             | DSM 20213 <sup>T</sup>                |
| <i>B. dentium</i> B764                                                                                                         | DSM 20436 <sup>T</sup>                |
| <i>B. longum</i> subsp. <i>longum</i> E194b                                                                                    | DSM 20219 <sup>T</sup>                |
| <i>B. longum</i> subsp. <i>longum</i> 105-A                                                                                    | JCM 31944                             |
| <i>B. longum</i> subsp. <i>longum</i> 105-A type 4 <i>ldh</i> ::pMSK127                                                        | -                                     |
| <i>B. longum</i> subsp. <i>longum</i> 105-A type 4 <i>ldh</i> ::pMSK127 / pMSK128 ( <i>Px<sub>fp</sub></i> -type4 <i>ldh</i> ) | -                                     |
| <i>B. longum</i> subsp. <i>infantis</i> S12                                                                                    | DSM 20088 <sup>T</sup>                |
| <i>B. pseudolongum</i> subsp. <i>pseudolongum</i> PNC-2-9G                                                                     | DSM 20099 <sup>T</sup>                |
| <i>B. scardovii</i> CCUG 13008 A                                                                                               | DSM 13734 <sup>T</sup>                |
| <i>B. catenulatum</i> B669                                                                                                     | DSM 16992 <sup>T</sup>                |
| <i>B. pseudocatenulatum</i> B1279                                                                                              | DSM 20438 <sup>T</sup>                |

<sup>1</sup>Superscript "T" indicates type strain



**Supplementary Table 7.** Primers used for generation of type 4 *ldh* insertional mutant and type 4 *ldh* complemented strain.

| <b>Primer name</b> | <b>Primer sequence (5'-nucleotide sequence-3')<sup>1</sup></b> |
|--------------------|----------------------------------------------------------------|
| Pr-543             | TATATATGAGTACTGaggtgcagcgcgtgctcctt                            |
| Pr-546             | CAGGCATGCAAGCTTtggcctacgaacctgtctgg                            |
| Pr-580             | CCAGCTCAAGGGATCgcccgcgacctcgatgatg                             |
| Pr-581             | CGGTACCCGGGGATCgtggacacggaggcgaaac                             |
| Pr-598             | GGAAGATCACTTCGCttcgaacatgggaaatcgaa                            |
| Pr-599             | GTTCATAGTGACCATAagcactccttgggggccgc                            |
| Pr-600             | atggtcactatgaaccgcaacaaag                                      |
| Pr-601             | CGTGGGATCCGTCGAtcacagcagcccctcgcagt                            |

<sup>1</sup>Uppercase letter indicates sequence for In-Fusion cloning

**Supplementary Table 8.** Human milk oligosaccharides (HMOs), their retention time and mass-to-charge ratio ( $m/z$ ).

| <b>Abbreviation</b>     | <b>HMO</b>                                               | <b>Retention time [min]</b> | <b>[<math>m/z</math>]</b> | <b>ESI<sup>+</sup> ion</b> |
|-------------------------|----------------------------------------------------------|-----------------------------|---------------------------|----------------------------|
| 2'FL / 3FL              | 2'-O-Fucosyllactose / 3-O-Fucosyllactose                 | 0.6                         | 489.1814                  | [M+H] <sup>+</sup>         |
| LNT / LN <sub>n</sub> T | Lacto- <i>N</i> -tetraose / Lacto- <i>N</i> -neotetraose | 0.7                         | 708.2557                  | [M+H] <sup>+</sup>         |
| 3'SL / 6'SL             | 3'-O-Sialyllactose / 6'-O-Sialyllactose                  | 0.7                         | 634.2189                  | [M+H] <sup>+</sup>         |

**Supplementary Table 9.** Optimized parameters used for pre-processing the urine metabolome data in mzMine2.8

|               | Batch step                 | Parameters                                                                                                                                                                                                |
|---------------|----------------------------|-----------------------------------------------------------------------------------------------------------------------------------------------------------------------------------------------------------|
| Negative Mode | Mass detection             | Noise level: 1.0E1                                                                                                                                                                                        |
|               | Chromatogram builder       | Min time span (min): 0.01<br>Min height:3.0E1 ; <i>m/z</i> tolerance: 0.06 <i>mz</i> or 25 ppm                                                                                                            |
|               | Chromatogram deconvolution | Chromatographic threshold: 90%; Search minimum in RT range (min): 0.01; Minimum relative height: 5%; Minimum absolute height: 3.0E1; Min ratio of peak/top edge: 1.0; Peak duration range (min): 0.01-0.2 |
|               | Isotopic pattern           | <i>m/z</i> tolerance: 0.06 or 30 ppm; Retention time tolerance: 0.02; Monotonic shape; maximum charge: 1                                                                                                  |
|               | Join aligner               | <i>m/z</i> tolerance: 0.03 or 20 ppm; Absolute retention time tolerance: 0.2; Weight for both <i>m/z</i> tolerance and retention time tolerance: 10                                                       |
|               | Peak finder (gap filling)  | Intensity tolerance: 50%; <i>m/z</i> tolerance: 0.03or 20 ppm; Absolute retention time tolerance: 0.03                                                                                                    |

\**m/z*: mass to charge ratio; RT: retention time; Intensity: Peak area

**Supplementary Table 10.** Reagents used for human T-cell cultures.

| <b>Reagent</b>                              | <b>Source</b>      | <b>Cat no. / RRID</b> |
|---------------------------------------------|--------------------|-----------------------|
| Triton X-100                                | Sigma-Aldrich      | T8787                 |
| Paraformaldehyde (PFA)                      | Sigma-Aldrich      | P6148                 |
| Low melting point agarose                   | Invitrogen         | 16520-100             |
| Fetal Bovine Serum (FBS)                    | Gibco              | ADD                   |
| 4',6'-diamidino-2-phenylindole (DAPI)       | Thermo Fisher      | D1306                 |
| Tween-20                                    | Sigma-Aldrich      | P1379                 |
| Gibco™ DPBS                                 | Thermo Fisher      | 14-190-144            |
| β-mercapatoethanol                          |                    |                       |
| Hepes                                       | Gibco              |                       |
| L-glutamine                                 | Gibco              |                       |
| Penicillin / Streptomycin                   | Thermo Fisher      | 15140122              |
| H <sub>2</sub> SO <sub>4</sub>              | Sigma-Aldrich      | 339741                |
| IL-6                                        | R&D                | 206-IL-050            |
| TGFβ                                        | R&D                | 240-B-010             |
| IL-23                                       | R&D                | 1290-IL-010           |
| IL-1β                                       | R&D                | 201-LB-010            |
| ImmunoCult™ Human CD3/CD28 T Cell Activator | Stemcell           | 10971                 |
| Lymphoprep                                  | Axis Shield Poc As | 11508545              |

# Supplementary figures

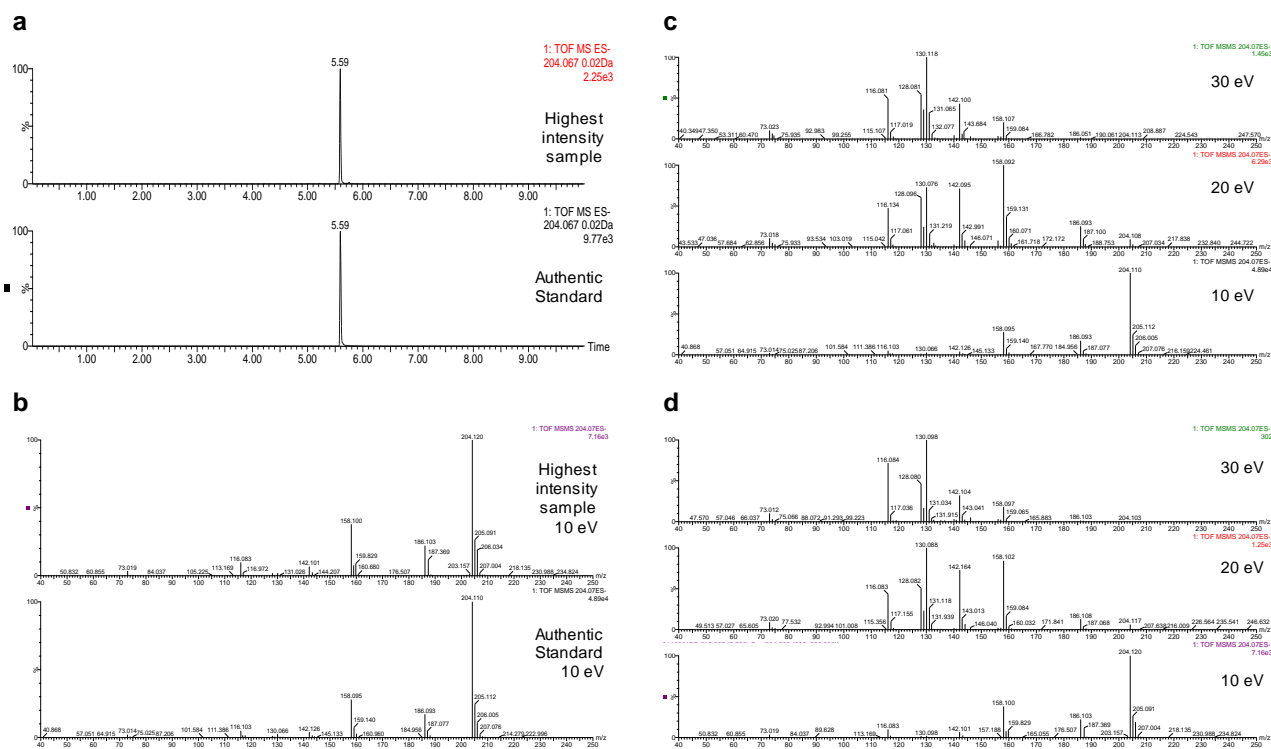

**Supplementary Figure 1. Identification of indolelactic acid in urine by extracted ion chromatograms and fragmentation profiles of indolelactic acid and sample with the highest intensity.**

**a**, Feature defined with 204.067  $m/z$  and 5.59 RT in negative ionization mode confirmed with authentic standard of indole lactic acid. **b**, MS/MS fragmentation profile of authentic standard and the highest intensity sample fragmented at 10 eV collision dissociation energy. **c**, MS/MS fragmentation profile of authentic standard of indole lactic acid at 10, 20 and 30 eV collision dissociation energies. **d**, MS/MS fragmentation profile of sample with highest intensity at 10, 20 and 30 eV collision dissociation energies.

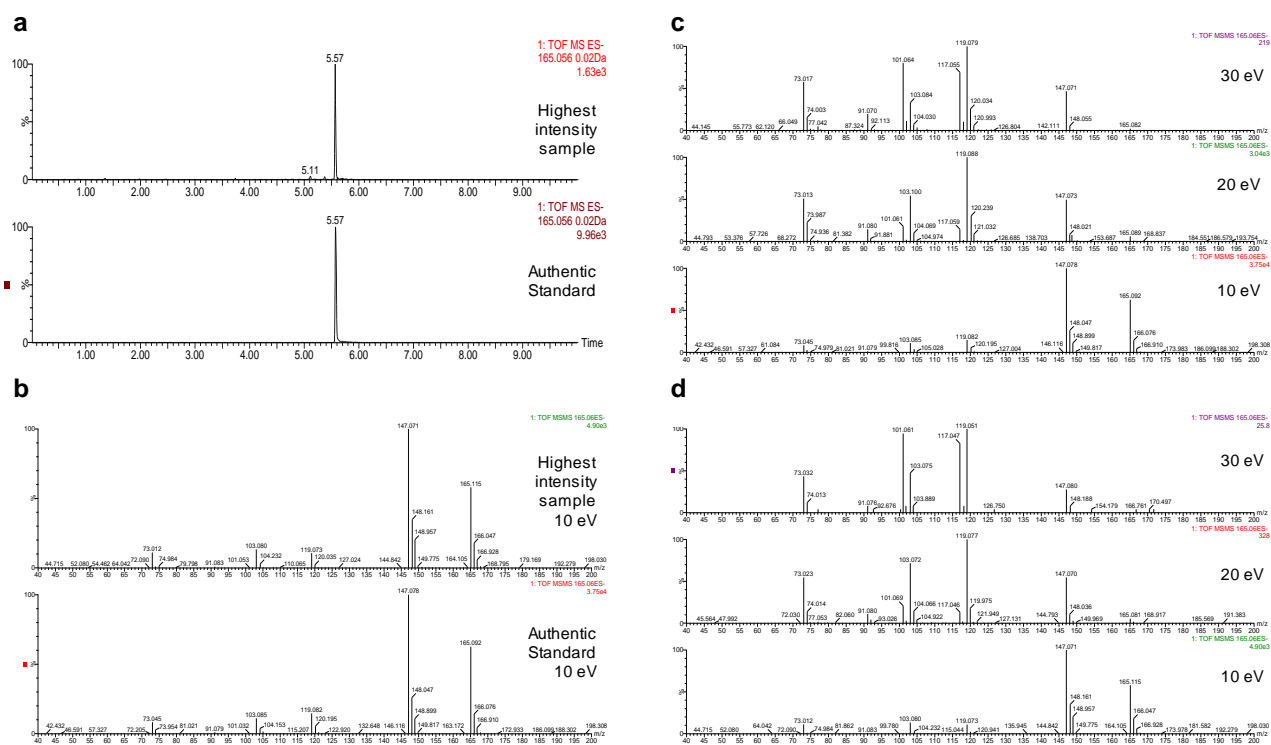

**Supplementary Figure 2. Identification of phenyllactic acid in urine by extracted ion chromatograms and fragmentation profiles of phenyllactic acid and sample with the highest intensity.**

**a**, Feature defined with 165.056  $m/z$  and 5.57 RT in negative ionization mode confirmed with authentic standard of phenyl lactic acid. **b**, MS/MS fragmentation profile of authentic standard and the highest intensity sample fragmented at 10 eV collision dissociation energy. **c**, MS/MS fragmentation profile of authentic standard of phenyl lactic acid at 10, 20 and 30 eV collision dissociation energies. **d**, MS/MS fragmentation profile of sample with highest intensity at 10, 20 and 30 eV collision dissociation energies.

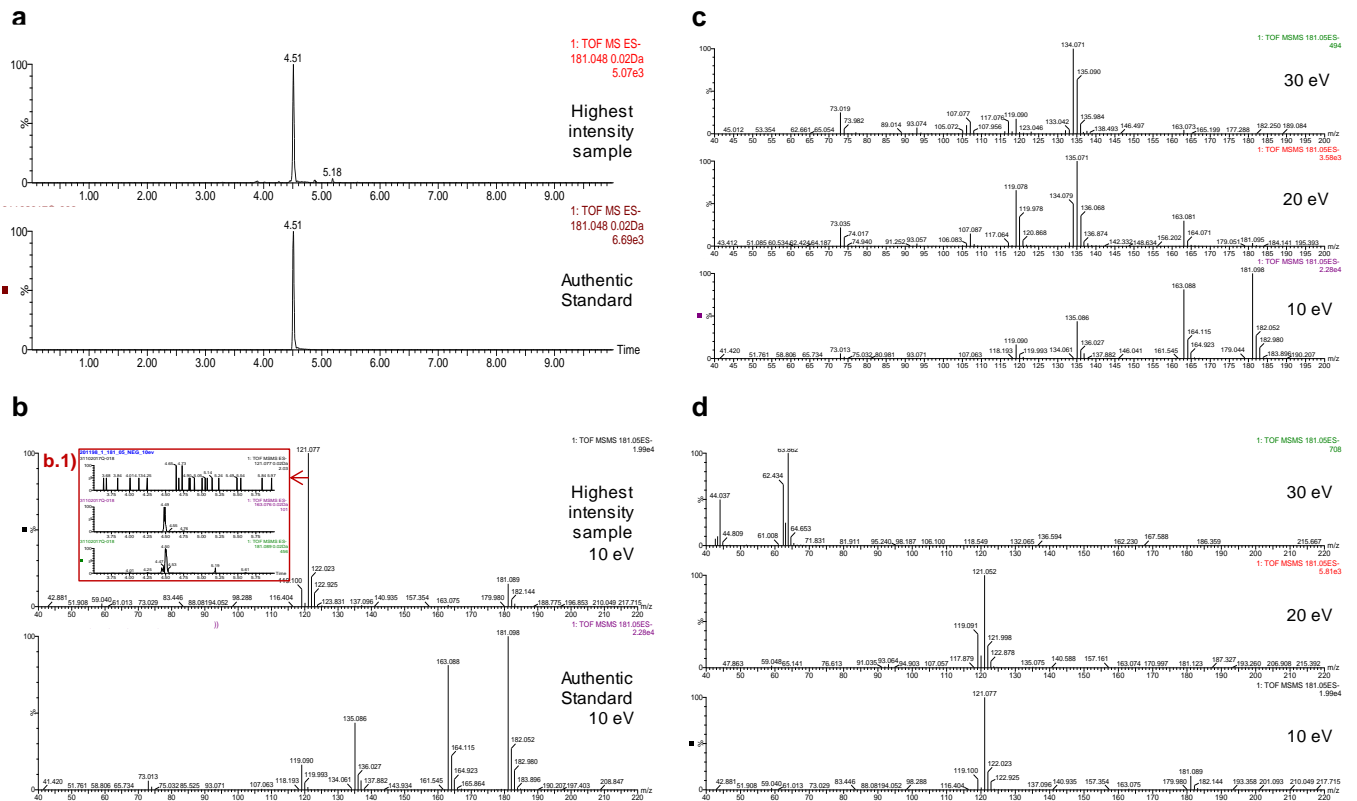

**Supplementary Figure 3. Identification of 4-hydroxyphenyllactic acid in urine by extracted ion chromatograms (EICs) and fragmentation profiles of 4-hydroxyphenyllactic acid and sample with the highest intensity.**

**a**, Feature defined with 181.048  $m/z$  and 4.51 RT in negative ionization mode confirmed with authentic standard of 4-hydroxyphenyllactic acid. **b**, MS/MS fragmentation profile of authentic standard and the highest intensity sample fragmented at 10 eV collision dissociation energy. b.1) EIC of 181.089  $m/z$  (parent ion), 163.075  $m/z$  (main fragment) and 121.077  $m/z$  shown with arrow indicates that the feature with 121.077  $m/z$  does not belong to the peak of 4-hydroxyphenyllactic acid. **c**, MS/MS fragmentation profile of authentic standard of 4-hydroxyphenyllactic acid at 10, 20 and 30 eV collision dissociation energies. **d**, MS/MS fragmentation profile of sample with highest intensity at 10, 20 and 30 eV collision dissociation energies.

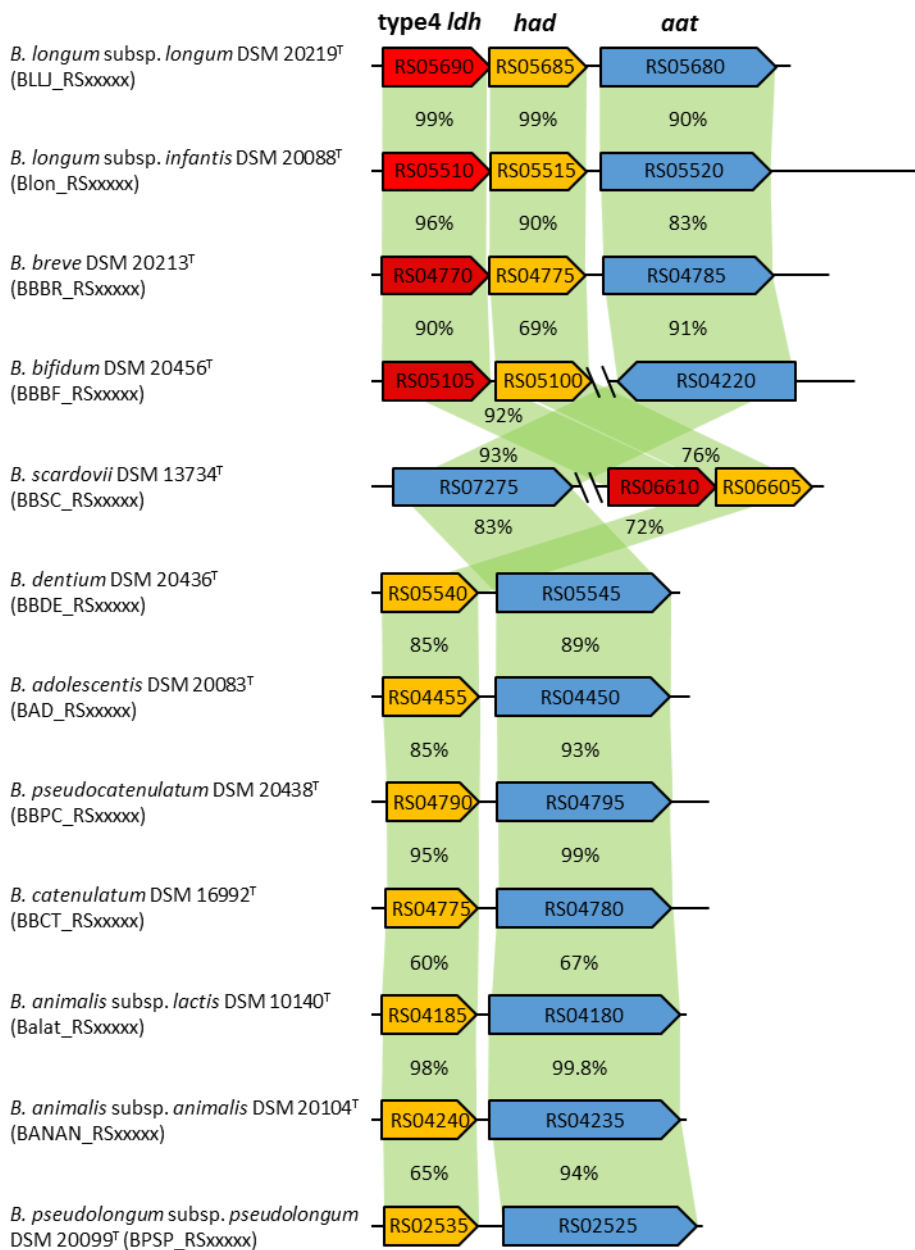

**Supplementary Figure 4. Comparison of 'type 4' *ldh* gene cluster in human-gut-associated *Bifidobacterium* type strains.** The 'type 4' *ldh*, *had*, and *aat* genes are represented by red, yellow, and blue arrows, respectively. The amino acid sequence identity was determined by conducting pairwise alignments in MBGD (Microbial Genome Database for Comparative Analysis; <http://mbgd.genome.ad.jp/>). *ldh*: lactate dehydrogenase gene, *had*: haloacid dehalogenase gene, *aat*: amino acid transaminase gene. The gene organization was drawn by drawGeneArrows3 (<http://www.ige.tohoku.ac.jp/joho/labhome/tool.html>).



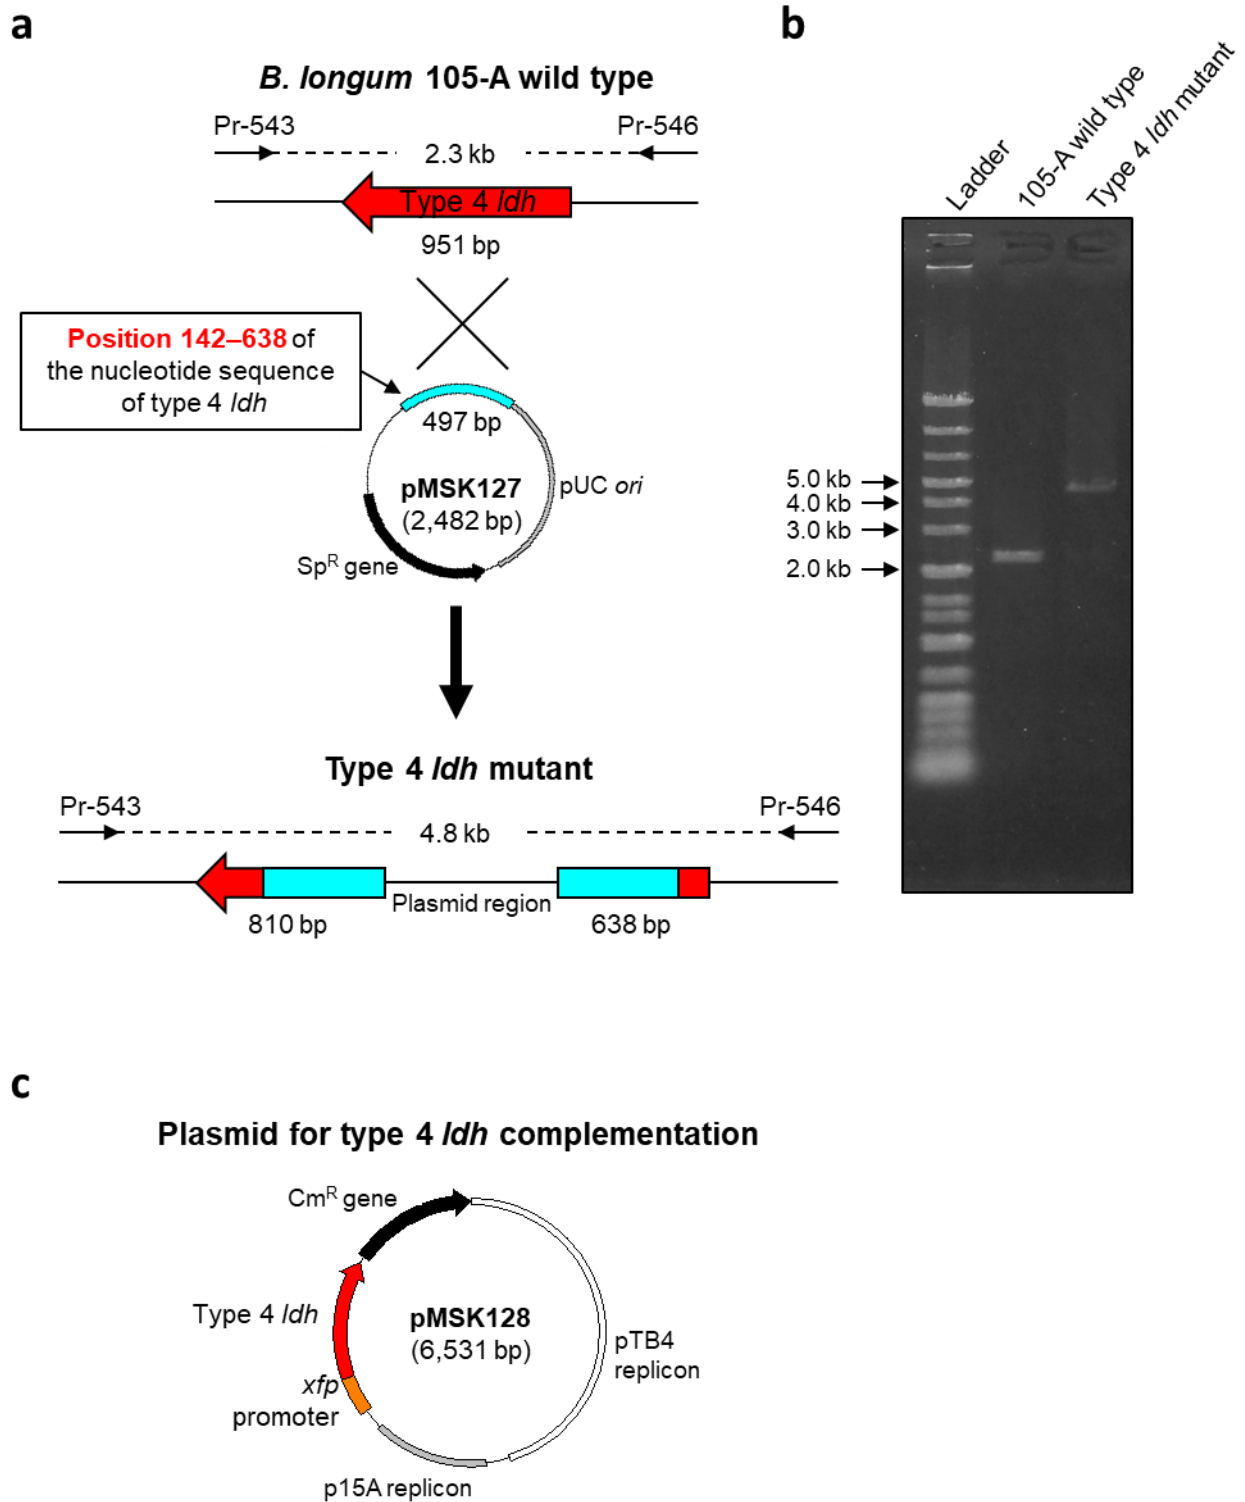

**Supplementary Figure 5. Generation of the type 4 *ldh* insertional mutant and type 4 *ldh* complemented strain. a,** Generation of type 4 *ldh* insertional mutant by single cross-over recombination with pMSK127 carrying the partial *ldh* gene from *B. longum* subsp. *longum* 105-A (BL105A\_0985). **b,** Insertion of pMSK127 was verified by genomic PCR using primers (Pr-543/Pr-546) designed to anneal the flanking regions of the *ldh* gene. The analysis was performed once. **c,** pMSK128, which carries the *ldh* gene (BL105A\_0985) under the control of *xfp* promoter, was introduced into type 4 *ldh* mutant to generate the type 4 *ldh*-complemented strain.

**a**

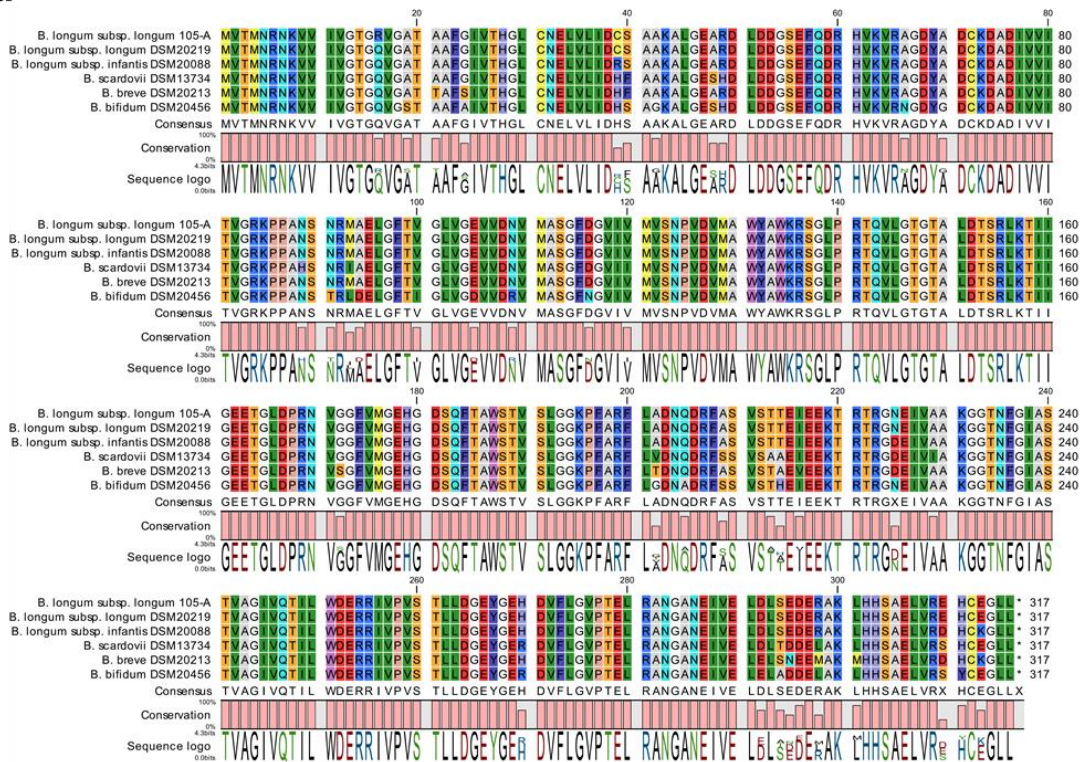

**b**

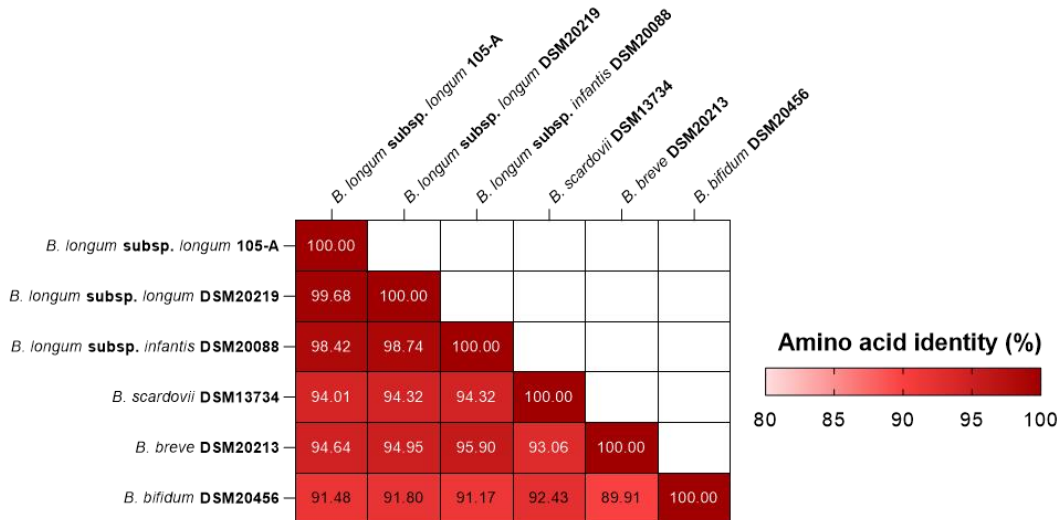

**Supplementary Figure 6. Analysis of type 4 LDH amino acid sequences.**

**a**, Alignment of the type 4 LDH amino acid sequences of *B. longum* subsp. *longum* 105-A and type strains of *B. longum* subsp. *longum*, *B. longum* subsp. *infantis*, *B. scardovii*, *B. breve* and *B. bifidum*. **b**, Heatmap showing amino acid percent identities in pairwise comparisons between the six strains.

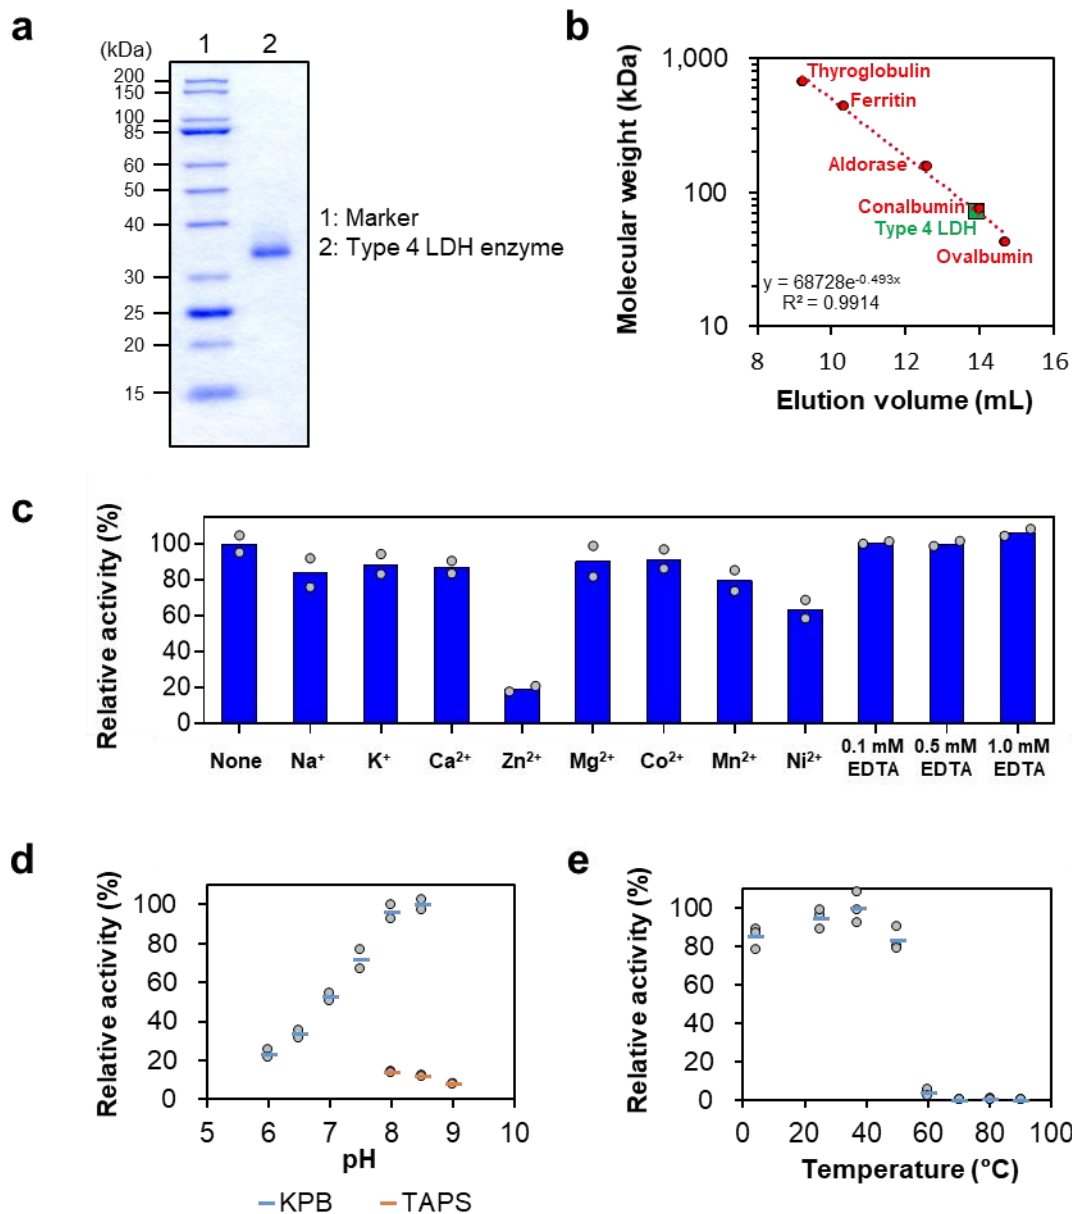

**Supplementary Figure 7. The physicochemical properties of type 4 LDH enzyme.**

**a**, Representative picture of two independent SDS-PAGE runs of type 4 LDH enzyme. Lane 1, Marker; Lane 2, purified type 4 LDH enzyme. **b**, The native molecular mass of the recombinant type 4 LDH was estimated by size exclusion chromatography. Thyroglobulin (669 kDa), ferritin (440 kDa), aldolase (158 kDa), conalbumin (75 kDa), ovalbumin (43 kDa) were used as molecular markers. Symbols (dots for markers and squares for type 4 LDH) indicate the values obtained for two independent assays. **c**, The effect of metal ions on activity. Dots and bars indicate the respective values and means of two independent assays, respectively. **d**, The effect of pH on activity. Data are shown by dots and lines representing the values of two independent assays and the means, respectively. **e**, The temperature stability of the enzyme. Data are shown by dots and lines that indicate the values of three independent assays and the means, respectively.

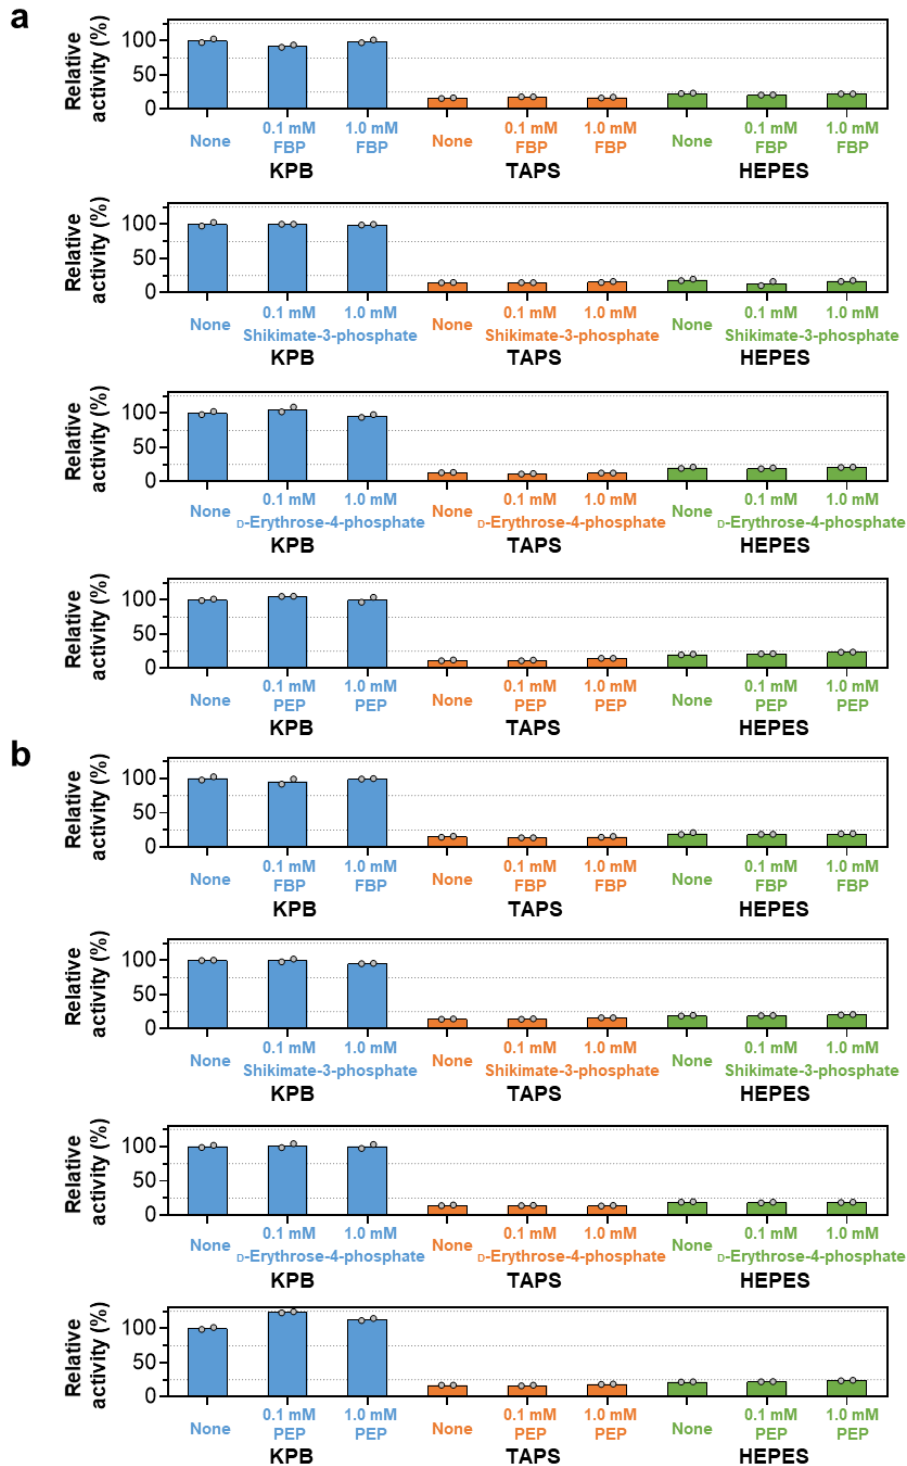

**Supplementary Figure 8. The effect of phosphate compounds on the activity of type 4 LDH enzyme. a-b,** The compounds with phosphate group were added into the reaction mixture containing either 50 mM KPb, TAPS buffer, or HEPES buffer (pH 8.0) prior to the enzymatic assay. Substrate phenylpyruvic acid was added to give a final concentration of 1 mM (a) and 4 mM (b). FBP, fructose-1,6-bisphosphate; PEP, phosphoenolpyruvic acid. Data are shown with dots and bars that represent the values obtained for two independent assays and the means, respectively.

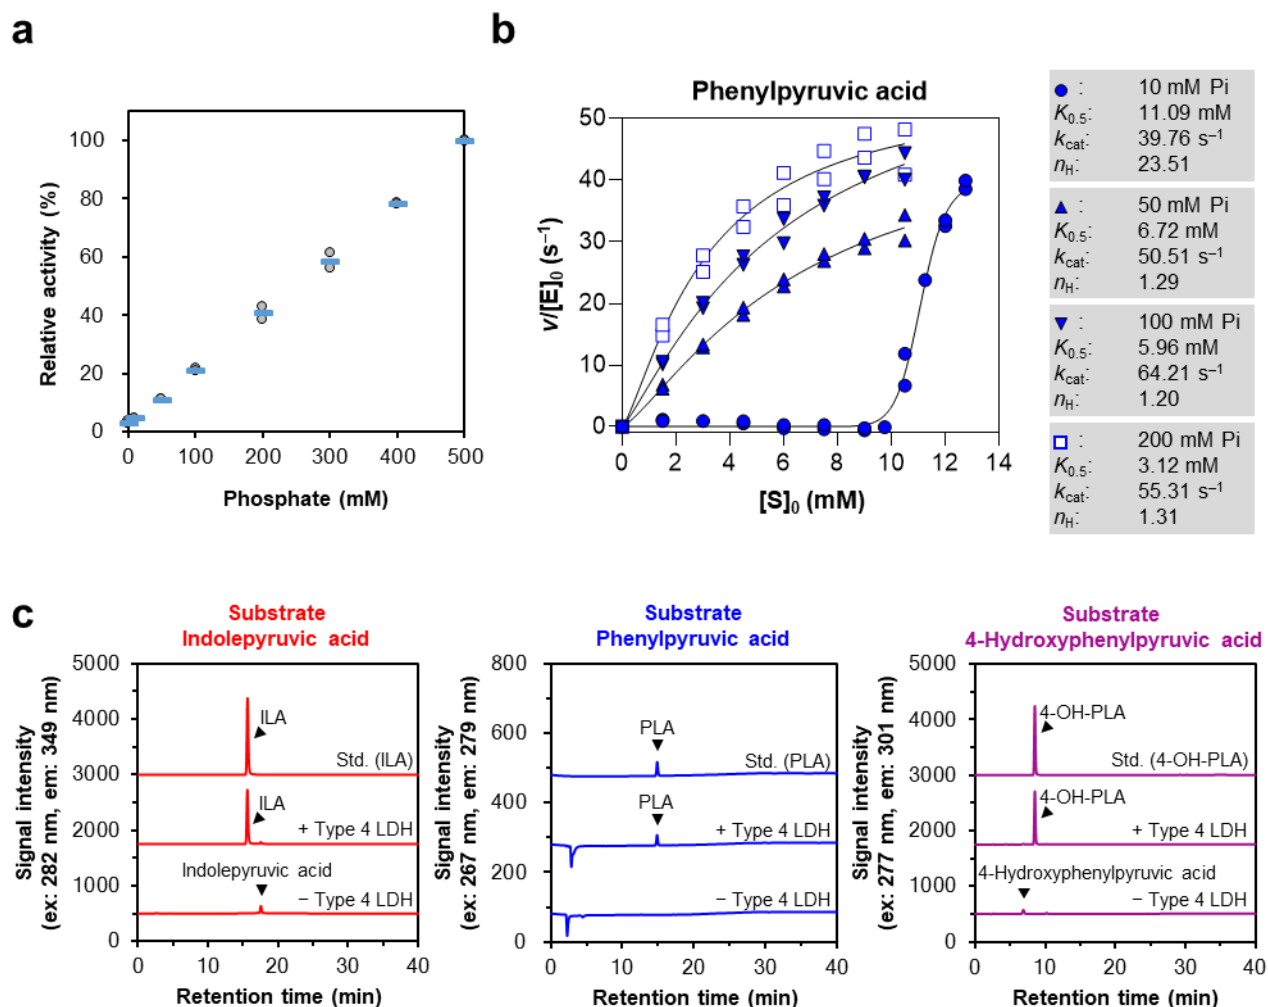

**Supplementary Figure 9. Effect of phosphate concentration on type 4 LDH activity and HPLC chromatograms showing formation of aromatic lactic acids from respective aromatic pyruvic acids.**

**a**, The effect of phosphate ion on enzyme activity. Data are shown with dots and lines representing the values obtained for two independent assays and the means, respectively. **b**, Substrate saturation curves obtained for type 4 LDH in the presence of different concentrations of phosphate. Phenylpyruvic acid was used as a substrate. The parameters were calculated by curve-fitting two independent experimental data to Hill equation. The same data as in Fig. 3b was used for 100 mM Pi. **c**, Formation of aromatic lactic acids from respective aromatic pyruvic acids, verified by HPLC analysis. The reaction mixture contained 100 mM KPB (pH 8.0), 1mM 2-ME, 1 mM  $\beta$ -NADH, 1.5  $\mu$ M type 4 LDH enzyme, and 1 mM substrate. After incubation at 37 °C for 30 min, the reaction mixtures were analysed by HPLC. Ten-fold dilution was applied before HPLC run for the samples containing indolepyruvic acid as the substrate. Standard concentrations were 0.1 mM (ILA) or 1 mM (PLA and 4-OH-PLA). Note that phenylpyruvic acid was not detected under the used excitation/detection conditions. One representative chromatogram of two independent runs for each compound is shown.

**a**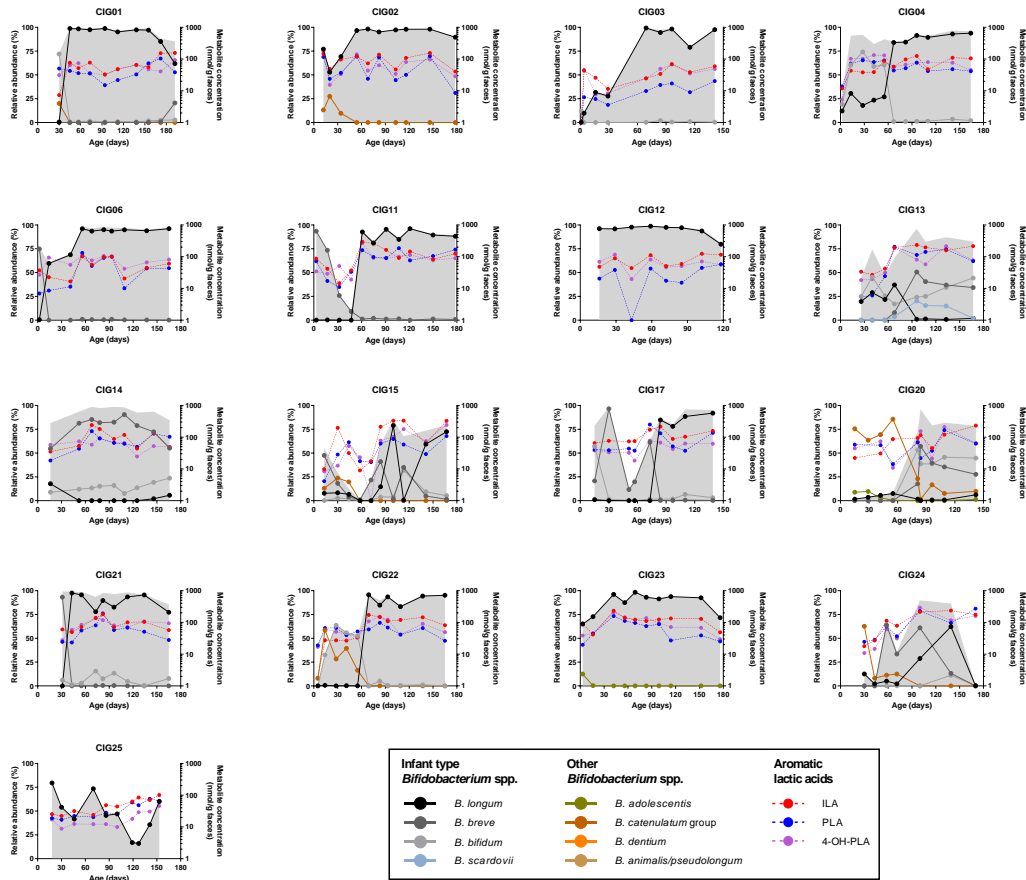**b**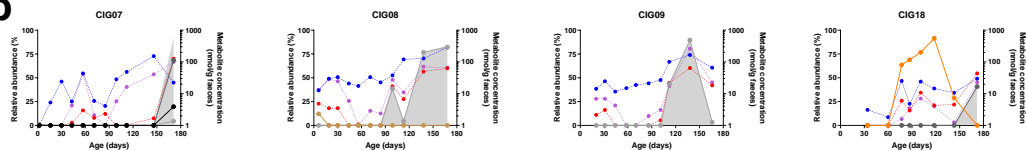**c**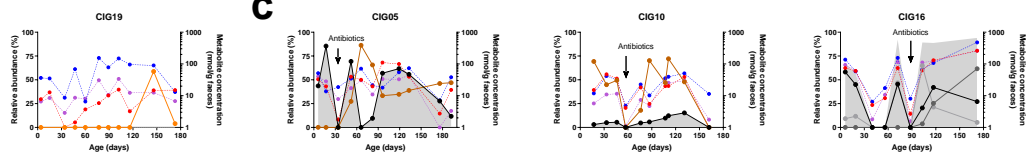

**Supplementary Figure 10. Relative abundances of *Bifidobacterium* species and concentrations of aromatic lactic acids in the CIG cohort.**

Relative abundance of *Bifidobacterium* spp. (average relative abundance >1% of total community) and concentrations of indolelactic acid (ILA), phenyllactic acid (PLA) and 4-hydroxyphenyllactic acid (4-OH-PLA) in all individuals from the Copenhagen Infant Gut (CIG) cohort. Values of metabolite concentrations below 1 nmol/g faeces are not shown. Infant type *Bifidobacterium* spp. is the sum of the absolute abundances of *B. longum*, *B. breve*, *B. bifidum* and *B. scardovii* and is indicated with grey background shading. **a**, Infants early and consistently colonised with infant type *Bifidobacterium* spp. (colonize within first month reaching average relative abundance >40% during first 6 months). **b**, Infants with late colonization of infant type *Bifidobacterium* spp. (not detectable or on average <0.5% of total community within the first 3 months of life) and **c**, Infants that received oral antibiotics during sampling.

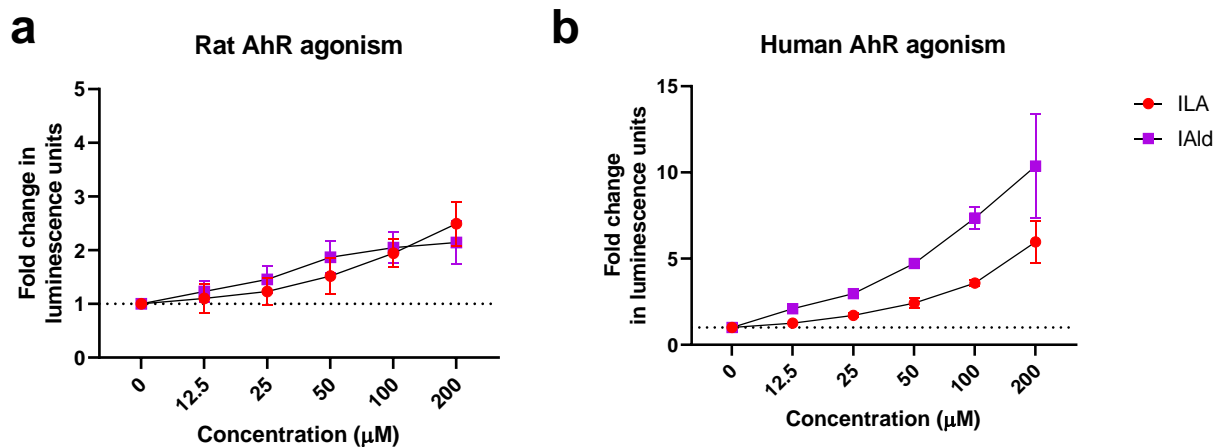

**Supplementary Figure 11. Indolelactic acid is an aryl hydrocarbon receptor (AhR) agonist.**

Dose-dependent effects of indolelactic acid (ILA) and indolealdehyde (IAld) in **a**, rat and **b**, human AhR reporter assays. The AhR activity (Luminescence Units) of the indoles were reported as fold changes relative to vehicle signal (0 μM). Data are presented as mean+SD of two (**a**) to three (**b**) experiments including three technical replicates.

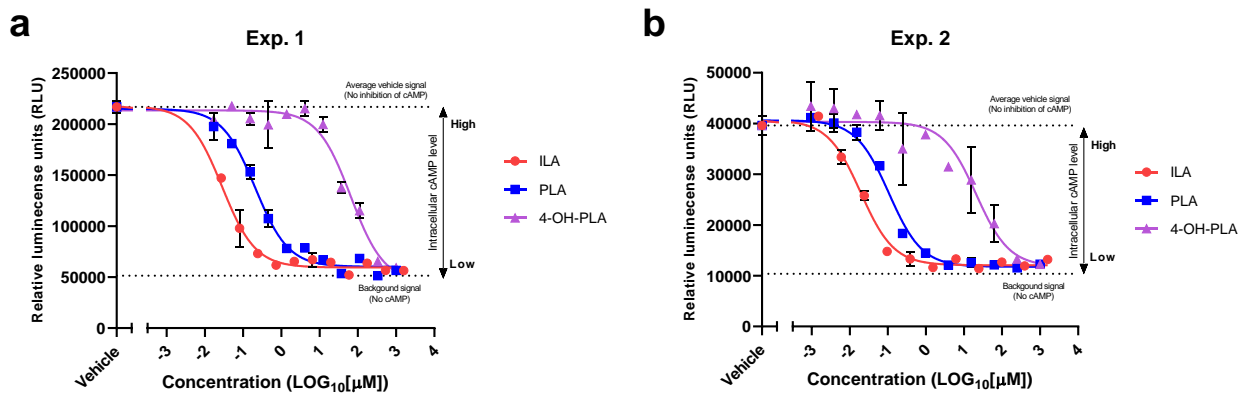

**Supplementary Figure 12. Aromatic lactic acids are hydroxycarboxylic acid 3 (HCA<sub>3</sub>) receptor agonist.**

Dose-dependent effects of indolelactic acid (ILA), phenyllactic acid (PLA) and 4-hydroxyphenyllactic acid (4-OH-PLA) in a human HCA<sub>3</sub> receptor assay (cAMP Hunter™ eXpress GPR109B CHO-K1 GPCR Assay). Activation of the G-protein coupled HCA<sub>3</sub> receptor results in activation of the G $\alpha$ -inhibitory subunit, which inhibits intracellular adenylyl cyclase activity and reduces forskolin-induced cAMP levels. cAMP levels are detected by a competitive immunoassay based on  $\beta$ -galactosidase hydrolysis of a substrate producing a luminescence signal. The ability of the aromatic lactic acids to activate the HCA<sub>3</sub> receptor results in a decrease of forskolin-induced cAMP levels, resulting in inhibition of the luminescence signal (Relative Luminescence Units). Serial dilutions of the aromatic lactic acids were compared to average vehicle signal (0  $\mu$ M) and average background signal (no forskolin induction of cAMP). Data are presented as two independent experiments (**a** and **b**) with mean $\pm$ SD of two technical replicates each. Curves were fitted to the data points by non-linear regression.



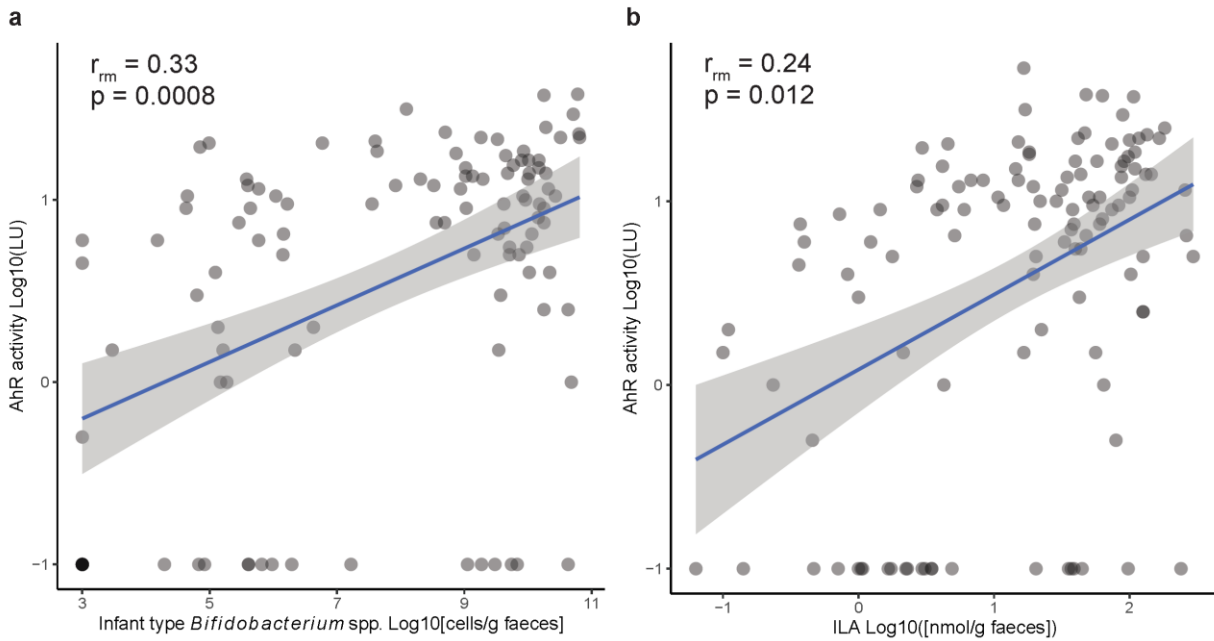

**Supplementary Figure 13. Associations between Infant type *Bifidobacterium* species/ILA and AhR activity in faecal water from the CIG infants.**

Scatter dot plots of the relationship between faecal abundance of **a**, infant type *Bifidobacterium* spp or **b**, ILA and AhR activity (Luminescence Units, LU) measured in faecal water of the CIG infants. Statistical significance is evaluated by two-sided repeated measures correlations ( $r_{rm}$  is the repeated measures correlation coefficient). Linear regression curve fits are shown with coloured mean line and 95% CI indicated in grey shading.

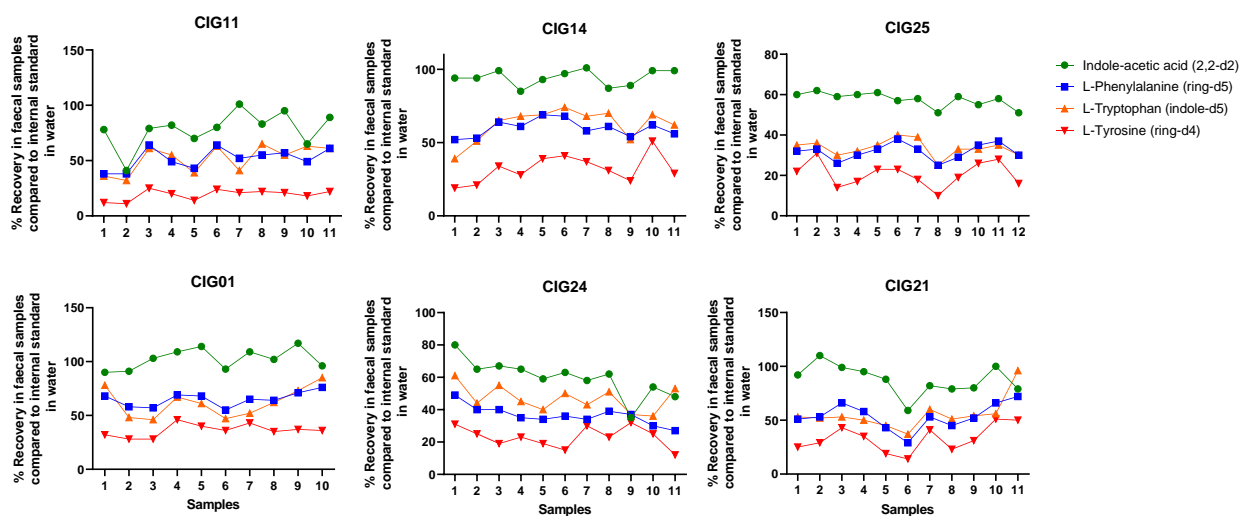

### Supplementary Fig 14. Recoveries of internal standards in stool samples.

The recovery of internal standards in stool samples varied. However, the recovery of the internal standards relative to each other were in general rather consistent as demonstrated by the relative recoveries (Internal standard peak area in faecal sample divided by internal standard peak area in water) of internal standards in stool samples of six Copenhagen Infant Gut (CIG) infants.

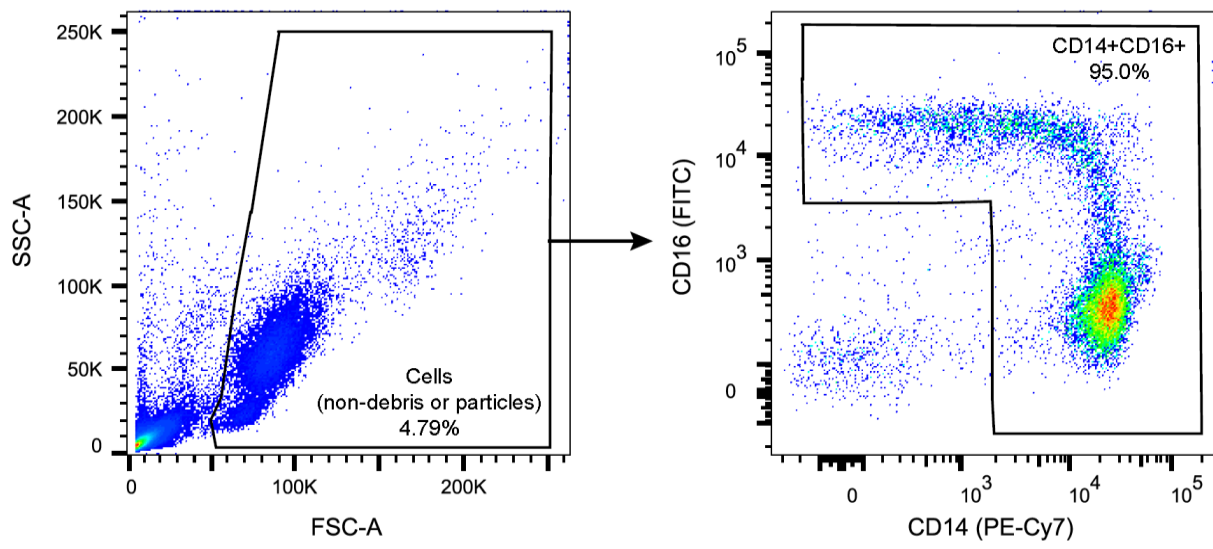

**Supplementary Fig. 15. Gating for purity check upon purification of monocytes (CD14+/CD16+).**

Uncropped gel for Supplementary Figure 5b

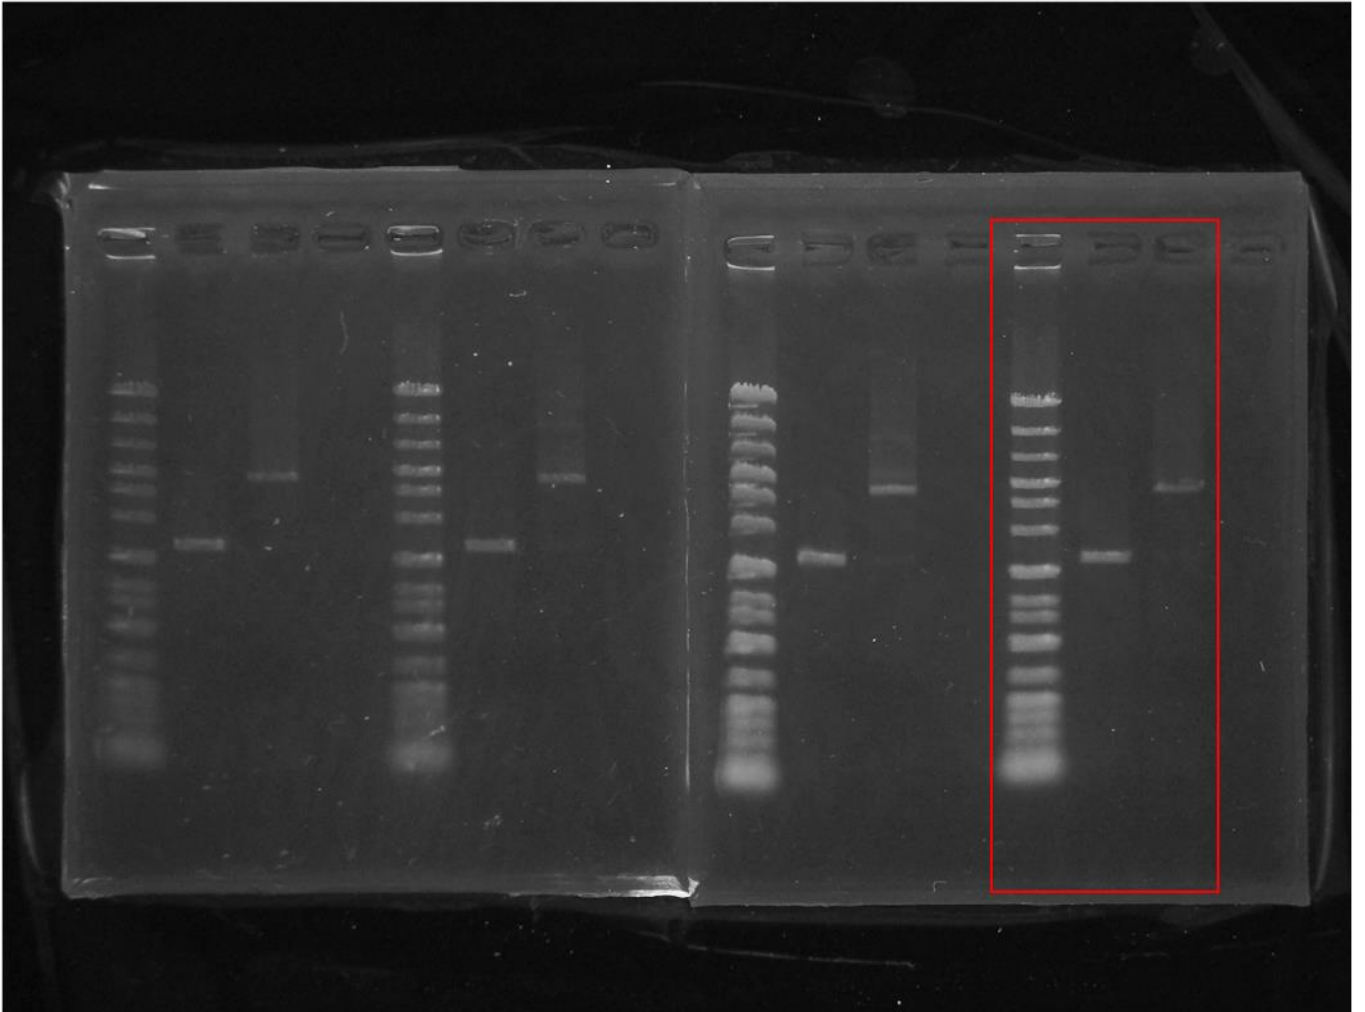

Uncropped gel for Supplementary Figure 7a

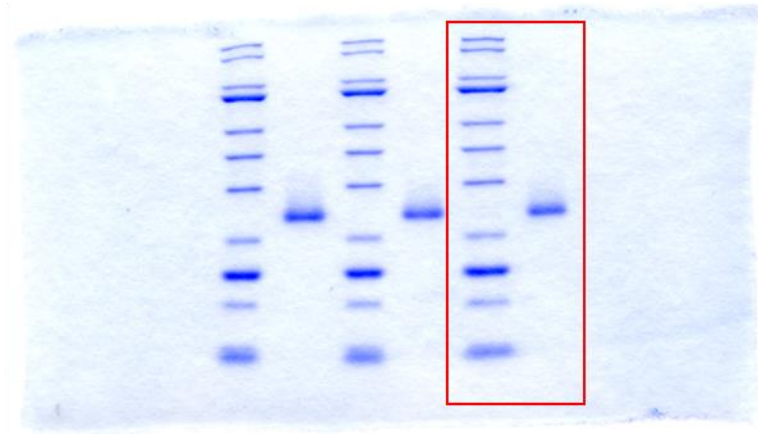

## References

1. Laursen, M. F., Dalgaard, M. D. & Bahl, M. I. Genomic GC-Content Affects the Accuracy of 16S rRNA Gene Sequencing Based Microbial Profiling due to PCR Bias. *Front. Microbiol.* **8**, 1934 (2017).
2. Tulstrup, M. V. L. *et al.* Antibiotic Treatment Affects Intestinal Permeability and Gut Microbial Composition in Wistar Rats Dependent on Antibiotic Class. *PLoS One* **10**, (2015).
3. Frese, S. A. *et al.* Persistence of Supplemented *Bifidobacterium longum* subsp. *infantis* EVC001 in Breastfed Infants. *mSphere* **2**, (2017).
4. Lawley, B. *et al.* Differentiation of *Bifidobacterium longum* subspecies *longum* and *infantis* by quantitative PCR using functional gene targets. *PeerJ* **5**, e3375 (2017).
5. Matsuki, T. *et al.* Quantitative PCR with 16S rRNA-Gene-Targeted Species-Specific Primers for Analysis of Human Intestinal Bifidobacteria. *Appl. Environ. Microbiol.* **70**, 167–173 (2004).
6. Junick, J. & Blaut, M. Quantification of human fecal *Bifidobacterium* species by use of quantitative real-time PCR analysis targeting the *groEL* gene. *Appl. Environ. Microbiol.* **78**, 2613–2622 (2012).
